# Supplementary material for: Identification of a Latin American-specific BabA adhesin variant through whole genome sequencing of Helicobacter pylori patient isolates from Nicaragua
Source: PubMed Central journal article supplement (PMC4770546; doi:10.1186/s12862-016-0619-y), 2016-02-29
Supplement: 12862_2016_619_MOESM1_ESM.pdf [file 12862_2016_619_MOESM1_ESM.pdf]

**Supplementary table 1, Assembly statistics**

| Strain   | Platform | Genome Size (bp) | N50    | Assembly coverage (fold)* | Contig number | Predicted ORFs |
|----------|----------|------------------|--------|---------------------------|---------------|----------------|
| Nic01_A  | MiSeq    | 1635022          | 97236  | 104                       | 43            | 1554           |
| Nic01_C  | MiSeq    | 1634715          | 102833 | 123                       | 43            | 1551           |
| Nic02_A  | MiSeq    | 1650600          | 101936 | 101                       | 57            | 1523           |
| Nic03_A  | MiSeq    | 1622608          | 152273 | 135                       | 29            | 1541           |
| Nic03_C  | HiScan   | 1611783          | 167087 | 424                       | 33            | 1529           |
| Nic04_A  | MiSeq    | 1679776          | 108809 | 182                       | 44            | 1593           |
| Nic04_C  | MiSeq    | 1675086          | 59368  | 153                       | 72            | 1620           |
| Nic05_A  | MiSeq    | 1652071          | 79794  | 160                       | 46            | 1591           |
| Nic05_C  | MiSeq    | 1648917          | 83858  | 115                       | 41            | 1587           |
| Nic06_A  | MiSeq    | 1673541          | 78913  | 130                       | 40            | 1588           |
| Nic06_A2 | MiSeq    | 1676080          | 61683  | 253                       | 47            | 1598           |
| Nic07_A  | MiSeq    | 1650700          | 69918  | 125                       | 37            | 1569           |
| Nic07_C  | MiSeq    | 1650594          | 80063  | 129                       | 33            | 1570           |
| Nic08_C2 | MiSeq    | 1574456          | 52590  | 277                       | 55            | 1529           |
| Nic08_C  | MiSeq    | 1574718          | 62001  | 303                       | 48            | 1530           |
| Nic09_A  | MiSeq    | 1632217          | 54886  | 292                       | 54            | 1580           |
| Nic09_C  | MiSeq    | 1630444          | 75481  | 207                       | 54            | 1573           |
| Nic10_A  | MiSeq    | 1662645          | 79604  | 455                       | 53            | 1590           |
| Nic10_C  | MiSeq    | 1660232          | 93535  | 159                       | 46            | 1586           |
| Nic11_A  | MiSeq    | 1651432          | 80206  | 304                       | 40            | 1561           |
| Nic11_C  | MiSeq    | 1654044          | 47705  | 495                       | 66            | 1568           |
| Nic12_A  | MiSeq    | 1696688          | 51457  | 437                       | 78            | 1643           |
| Nic12_C  | MiSeq    | 1687089          | 55209  | 499                       | 56            | 1616           |
| Nic13_A  | MiSeq    | 1666823          | 62724  | 292                       | 61            | 1627           |
| Nic13_C  | MiSeq    | 1662354          | 34480  | 438                       | 82            | 1624           |
| Nic14_A  | MiSeq    | 1669747          | 69948  | 447                       | 40            | 1575           |
| Nic14_C  | MiSeq    | 1643796          | 53712  | 340                       | 68            | 1609           |
| Nic15_A  | MiSeq    | 1638822          | 112091 | 390                       | 31            | 1558           |
| Nic15_C  | MiSeq    | 1636264          | 145448 | 480                       | 32            | 1552           |
| Nic16_A  | MiSeq    | 1653644          | 131180 | 481                       | 34            | 1563           |
| Nic16_C  | MiSeq    | 1649746          | 130872 | 351                       | 29            | 1564           |
| Nic17_A  | MiSeq    | 1687918          | 71512  | 650                       | 62            | 1649           |
| Nic17_C  | MiSeq    | 1687001          | 71942  | 439                       | 60            | 1651           |
| Nic18_A  | MiSeq    | 1659406          | 125192 | 555                       | 39            | 1554           |
| Nic18_C  | MiSeq    | 1656362          | 184347 | 572                       | 33            | 1547           |
| Nic19_A  | MiSeq    | 1653912          | 128740 | 512                       | 32            | 1560           |
| Nic19_C  | MiSeq    | 1650301          | 154963 | 534                       | 21            | 1548           |
| Nic20_A  | MiSeq    | 1601554          | 109971 | 599                       | 37            | 1526           |
| Nic20_C  | MiSeq    | 1654727          | 85059  | 436                       | 43            | 1558           |
| Nic21_A  | MiSeq    | 1648378          | 110422 | 526                       | 34            | 1560           |
| Nic21_C  | MiSeq    | 1707280          | 73869  | 497                       | 69            | 1630           |
| Nic22_A  | HiScan   | 1616285          | 60855  | 234                       | 80            | 1569           |
| Nic23_A  | HiScan   | 1663899          | 82136  | 331                       | 41            | 1578           |
| Nic24_A  | HiScan   | 1646116          | 82696  | 439                       | 42            | 1547           |
| Nic25_A  | HiScan   | 1671081          | 107491 | 204                       | 42            | 1554           |
| Nic26_A  | HiScan   | 1648891          | 156532 | 361                       | 30            | 1581           |
| Nic27_A  | HiScan   | 1644340          | 84225  | 254                       | 37            | 1607           |
| Nic28_A  | HiScan   | 1648102          | 107835 | 371                       | 29            | 1562           |
| Nic29_A  | HiScan   | 1644992          | 116003 | 458                       | 35            | 1596           |
| Nic30_A  | HiScan   | 1667014          | 138911 | 456                       | 31            | 1582           |
| Nic31_A  | HiScan   | 1594226          | 56940  | 517                       | 54            | 1572           |

**Supp. Table 2: Complete genomes used for comparative genomics**

| Organism                         | Accession number | n.o contigs <sup>a</sup> | n.o plasmids | Size (Mb) | GC%  |
|----------------------------------|------------------|--------------------------|--------------|-----------|------|
| Helicobacter pylori 2017         | NC_017374.1      | c                        | -            | 1.55      | 39.3 |
| Helicobacter pylori 2018         | NC_017381.1      | c                        | -            | 1.56      | 39.3 |
| Helicobacter pylori 26695        | NC_000915.1      | c                        | -            | 1.67      | 38.9 |
| Helicobacter pylori 35A          | NC_017360.1      | c                        | -            | 1.57      | 38.9 |
| Helicobacter pylori 51           | NC_017382.1      | c                        | -            | 1.59      | 38.8 |
| Helicobacter pylori 52           | NC_017354.1      | c                        | -            | 1.57      | 38.9 |
| Helicobacter pylori 83           | NC_017375.1      | c                        | -            | 1.62      | 38.7 |
| Helicobacter pylori 908          | NC_017357.1      | c                        | -            | 1.55      | 39.3 |
| Helicobacter pylori Aklavik117   | NC_019560.1      | c                        | 2            | 1.64      | 38.7 |
| Helicobacter pylori Aklavik86    | NC_019563.1      | c                        | 2            | 1.51      | 39.3 |
| Helicobacter pylori B38          | NC_012973.1      | c                        | -            | 1.58      | 39.2 |
| Helicobacter pylori Cuz20        | NC_017358.1      | c                        | -            | 1.64      | 38.9 |
| Helicobacter pylori ELS37        | NC_017063.1      | c                        | 1            | 1.67      | 38.9 |
| Helicobacter pylori F16          | NC_017368.1      | c                        | -            | 1.58      | 38.9 |
| Helicobacter pylori F30          | NC_017365.1      | c                        | 1            | 1.58      | 38.8 |
| Helicobacter pylori F32          | NC_017366.1      | c                        | 1            | 1.58      | 38.9 |
| Helicobacter pylori F57          | NC_017367.1      | c                        | -            | 1.61      | 38.7 |
| Helicobacter pylori G27          | NC_011333.1      | c                        | 1            | 1.66      | 38.9 |
| Helicobacter pylori Gambia94 24  | NC_017371.1      | c                        | 1            | 1.71      | 39.1 |
| Helicobacter pylori HPAG1        | NC_008086.1      | c                        | 1            | 1.61      | 39.1 |
| Helicobacter pylori HUP B14      | NC_017733.1      | c                        | 1            | 1.61      | 39.1 |
| Helicobacter pylori India7       | NC_017372.1      | c                        | -            | 1.68      | 38.9 |
| Helicobacter pylori J99          | NC_000921.1      | c                        | -            | 1.64      | 39.2 |
| Helicobacter pylori Lithuania75  | NC_017362.1      | c                        | 1            | 1.64      | 38.8 |
| Helicobacter pylori OK113        | NC_020508.1      | c                        | -            | 1.62      | 38.7 |
| Helicobacter pylori OK310        | NC_020509.1      | c                        | 1            | 1.6       | 38.8 |
| Helicobacter pylori P12          | NC_011498.1      | c                        | 1            | 1.68      | 38.8 |
| Helicobacter pylori PeCan18      | NC_017742.1      | c                        | -            | 1.66      | 39   |
| Helicobacter pylori PeCan4       | NC_014555.1      | c                        | 1            | 1.64      | 38.9 |
| Helicobacter pylori Puno120      | NC_017378.1      | c                        | 1            | 1.64      | 38.9 |
| Helicobacter pylori Puno135      | NC_017379.1      | c                        | -            | 1.65      | 38.8 |
| Helicobacter pylori Sat464       | NC_017359.1      | c                        | 1            | 1.57      | 39.1 |
| Helicobacter pylori Shi112       | NC_017741.1      | c                        | -            | 1.66      | 38.8 |
| Helicobacter pylori Shi169       | NC_017740.1      | c                        | -            | 1.62      | 38.9 |
| Helicobacter pylori Shi417       | NC_017739.1      | c                        | -            | 1.67      | 38.8 |
| Helicobacter pylori Shi470       | NC_010698.2      | c                        | -            | 1.61      | 38.9 |
| Helicobacter pylori SJM180       | NC_014560.1      | c                        | -            | 1.66      | 38.9 |
| Helicobacter pylori SNT49        | NC_017376.1      | c                        | 1            | 1.61      | 39   |
| Helicobacter pylori SouthAfrica7 | NC_017361.1      | c                        | 1            | 1.68      | 38.4 |
| Helicobacter pylori UM032        | NC_021215.2      | c                        | -            | 1.6       | 38.8 |
| Helicobacter pylori UM037        | NC_021217.2      | c                        | -            | 1.69      | 38.9 |
| Helicobacter pylori UM066        | NC_021218.2      | c                        | -            | 1.66      | 38.6 |
| Helicobacter pylori v225d        | NC_017355.1      | c                        | 1            | 1.6       | 39   |
| Helicobacter pylori XZ274        | NC_017926.1      | c                        | 1            | 1.66      | 38.6 |

<sup>a</sup> c stands for completed genome

**Supp. Table 3: whole-genome sequenced strains used for comparative genomics**

| <b>Organism</b>                  | <b>Assembly</b> | <b>Size (Mb)</b> | <b>GC%</b> |
|----------------------------------|-----------------|------------------|------------|
| Helicobacter pylori 98-10        | ASM17293v1      | 1.57             | 38.8       |
| Helicobacter pylori A45          | ASM33383v1      | 1.64             | 38.6       |
| Helicobacter pylori B128         | ASM17295v1      | 1.65             | 38.8       |
| Helicobacter pylori CG-IMSS-2012 | CGIMSS2012      | 1.6              | 39         |
| Helicobacter pylori CPY1124      | ASM27522v1      | 1.56             | 38.9       |
| Helicobacter pylori CPY1313      | ASM27520v1      | 1.58             | 38.8       |
| Helicobacter pylori CPY1962      | ASM27518v1      | 1.56             | 38.8       |
| Helicobacter pylori CPY3281      | ASM27472v1      | 1.61             | 38.7       |
| Helicobacter pylori CPY6081      | ASM27470v1      | 1.6              | 38.6       |
| Helicobacter pylori CPY6261      | ASM27468v1      | 1.61             | 38.7       |
| Helicobacter pylori CPY6271      | ASM27466v1      | 1.6              | 38.7       |
| Helicobacter pylori CPY6311      | ASM27464v1      | 1.6              | 38.7       |
| Helicobacter pylori FD506        | FD506           | 1.62             | 38.7       |
| Helicobacter pylori FD568        | FD568           | 1.61             | 38.7       |
| Helicobacter pylori GAM100Ai     | ASM31000v1      | 1.64             | 39.3       |
| Helicobacter pylori GAM101Biv    | ASM34494v1      | 1.62             | 39.3       |
| Helicobacter pylori GAM103Bi     | ASM34496v1      | 1.62             | 39.2       |
| Helicobacter pylori GAM105Ai     | ASM34498v1      | 1.67             | 39.2       |
| Helicobacter pylori GAM112Ai     | ASM34500v1      | 1.63             | 39.3       |
| Helicobacter pylori GAM114Ai     | ASM34502v1      | 1.62             | 39.3       |
| Helicobacter pylori GAM115Ai     | ASM34504v1      | 1.69             | 39.1       |
| Helicobacter pylori GAM117Ai     | ASM45576v1      | 1.64             | 39.2       |
| Helicobacter pylori GAM118Bi     | ASM34508v1      | 1.68             | 39.1       |
| Helicobacter pylori GAM119Bi     | ASM34510v1      | 1.66             | 39.2       |
| Helicobacter pylori GAM120Ai     | ASM34512v1      | 1.69             | 39.1       |
| Helicobacter pylori GAM121Aii    | ASM34514v1      | 1.67             | 39.2       |
| Helicobacter pylori GAM201Ai     | ASM34506v1      | 1.62             | 39.4       |
| Helicobacter pylori GAM210Bi     | ASM34516v1      | 1.62             | 39.2       |
| Helicobacter pylori GAM231Ai     | ASM34518v1      | 1.63             | 39.2       |
| Helicobacter pylori GAM239Bi     | ASM34520v1      | 1.63             | 39.2       |
| Helicobacter pylori GAM244Ai     | ASM34522v1      | 1.6              | 39.3       |
| Helicobacter pylori GAM245Ai     | ASM34524v1      | 1.65             | 39.1       |
| Helicobacter pylori GAM246Ai     | ASM34526v1      | 1.67             | 39.1       |
| Helicobacter pylori GAM249T      | ASM34528v1      | 1.63             | 39.3       |
| Helicobacter pylori GAM250AFi    | ASM34530v1      | 1.58             | 39.4       |
| Helicobacter pylori GAM250T      | ASM34532v1      | 1.58             | 39.4       |
| Helicobacter pylori GAM252Bi     | ASM34534v1      | 1.58             | 39.4       |
| Helicobacter pylori GAM252T      | ASM34536v1      | 1.58             | 39.4       |
| Helicobacter pylori GAM254Ai     | ASM34538v1      | 1.64             | 39.2       |
| Helicobacter pylori GAM260ASi    | ASM34540v1      | 1.63             | 39.3       |
| Helicobacter pylori GAM260Bi     | ASM34542v1      | 1.67             | 39.1       |
| Helicobacter pylori GAM260BSi    | ASM34544v1      | 1.58             | 39.4       |
| Helicobacter pylori GAM263BFi    | ASM34546v1      | 1.65             | 39.2       |
| Helicobacter pylori GAM264Ai     | ASM34548v1      | 1.61             | 39.3       |
| Helicobacter pylori GAM265BSii   | ASM34550v1      | 1.67             | 39.2       |
| Helicobacter pylori GAM268Bii    | ASM34552v1      | 1.64             | 39.2       |
| Helicobacter pylori GAM270ASi    | ASM34554v1      | 1.65             | 39.2       |

**Supp. Table 3 continued: WGS strains used for comparative genomics**

| <b>Organism</b>                  | <b>Assembly</b> | <b>Size (Mb)</b> | <b>GC%</b> |
|----------------------------------|-----------------|------------------|------------|
| Helicobacter pylori GAM42Ai      | ASM34556v1      | 1.62             | 39.3       |
| Helicobacter pylori GAM71Ai      | ASM34558v1      | 1.61             | 39.3       |
| Helicobacter pylori GAM80Ai      | ASM34560v1      | 1.64             | 39.2       |
| Helicobacter pylori GAM83Bi      | ASM34562v1      | 1.61             | 39.4       |
| Helicobacter pylori GAM83T       | ASM34564v1      | 1.61             | 39.4       |
| Helicobacter pylori GAM93Bi      | ASM34566v1      | 1.62             | 39.3       |
| Helicobacter pylori GAM96Ai      | ASM34568v1      | 1.66             | 39.4       |
| Helicobacter pylori GAMchJs106B  | ASM34570v1      | 1.58             | 39.5       |
| Helicobacter pylori GAMchJs114i  | ASM34681v1      | 1.62             | 39.3       |
| Helicobacter pylori GAMchJs117Ai | ASM34683v1      | 1.62             | 39.3       |
| Helicobacter pylori GAMchJs124i  | ASM34685v1      | 1.62             | 39.3       |
| Helicobacter pylori GAMchJs136i  | ASM34687v1      | 1.66             | 39.2       |
| Helicobacter pylori Hp A-11      | ASM35964v1      | 1.67             | 38.8       |
| Helicobacter pylori Hp A-14      | ASM27400v1      | 1.6              | 39         |
| Helicobacter pylori Hp A-16      | ASM27516v1      | 1.64             | 39.2       |
| Helicobacter pylori Hp A-17      | ASM27526v1      | 1.64             | 39.2       |
| Helicobacter pylori Hp A-20      | ASM27528v1      | 1.67             | 39.2       |
| Helicobacter pylori Hp A-26      | ASM27402v1      | 1.62             | 38.9       |
| Helicobacter pylori Hp A-27      | ASM27404v1      | 1.65             | 38.8       |
| Helicobacter pylori Hp A-4       | ASM27530v1      | 1.67             | 39.2       |
| Helicobacter pylori Hp A-5       | ASM27504v1      | 1.64             | 39.2       |
| Helicobacter pylori Hp A-6       | ASM27398v1      | 1.65             | 39.2       |
| Helicobacter pylori Hp A-8       | ASM27382v1      | 1.64             | 39.2       |
| Helicobacter pylori Hp A-9       | ASM27506v1      | 1.72             | 38.7       |
| Helicobacter pylori Hp H-1       | ASM34940v1      | 1.68             | 39         |
| Helicobacter pylori Hp H-10      | ASM27532v1      | 1.65             | 39.2       |
| Helicobacter pylori Hp H-11      | ASM27448v1      | 1.66             | 38.9       |
| Helicobacter pylori Hp H-16      | ASM27524v1      | 1.71             | 39         |
| Helicobacter pylori Hp H-18      | ASM27450v1      | 1.76             | 39         |
| Helicobacter pylori Hp H-19      | ASM27412v1      | 1.63             | 39.3       |
| Helicobacter pylori Hp H-21      | ASM27418v1      | 1.63             | 39.2       |
| Helicobacter pylori Hp H-23      | ASM27416v1      | 1.65             | 39.1       |
| Helicobacter pylori Hp H-24      | ASM27508v1      | 1.67             | 39.2       |
| Helicobacter pylori Hp H-24b     | ASM27558v1      | 1.67             | 39.1       |
| Helicobacter pylori Hp H-24c     | ASM27556v1      | 1.67             | 39.2       |
| Helicobacter pylori Hp H-27      | ASM27510v1      | 1.61             | 38.9       |
| Helicobacter pylori Hp H-28      | ASM27512v1      | 1.63             | 39         |
| Helicobacter pylori Hp H-29      | ASM27388v1      | 1.68             | 39.1       |
| Helicobacter pylori Hp H-3       | ASM27406v1      | 1.71             | 38.9       |
| Helicobacter pylori Hp H-30      | ASM27386v1      | 1.63             | 39.4       |
| Helicobacter pylori Hp H-34      | ASM27426v1      | 1.63             | 39.2       |
| Helicobacter pylori Hp H-36      | ASM27384v1      | 1.68             | 39         |
| Helicobacter pylori Hp H-4       | ASM27414v1      | 1.67             | 39.1       |
| Helicobacter pylori Hp H-41      | ASM27380v1      | 1.66             | 39.2       |
| Helicobacter pylori Hp H-42      | ASM27390v1      | 1.7              | 39.1       |
| Helicobacter pylori Hp H-43      | ASM27396v1      | 1.61             | 39.1       |
| Helicobacter pylori Hp H-44      | ASM27392v1      | 1.67             | 39.1       |

**Supp. Table 3 continued: WGS strains used for comparative genomics**

| <b>Organism</b>                    | <b>Assembly</b> | <b>Size (Mb)</b> | <b>GC%</b> |
|------------------------------------|-----------------|------------------|------------|
| Helicobacter pylori Hp H-45        | ASM27394v1      | 1.66             | 38.9       |
| Helicobacter pylori Hp H-5b        | ASM27436v1      | 1.71             | 38.9       |
| Helicobacter pylori Hp H-6         | ASM27410v1      | 1.71             | 38.9       |
| Helicobacter pylori Hp H-9         | ASM27408v1      | 1.64             | 38.8       |
| Helicobacter pylori Hp P-1         | ASM27478v1      | 1.67             | 39.1       |
| Helicobacter pylori Hp P-11        | ASM27420v1      | 1.69             | 39.1       |
| Helicobacter pylori Hp P-11b       | ASM27438v1      | 1.7              | 39.1       |
| Helicobacter pylori Hp P-13        | ASM27422v1      | 1.71             | 39         |
| Helicobacter pylori Hp P-13b       | ASM27440v1      | 1.71             | 39         |
| Helicobacter pylori Hp P-15        | ASM27428v1      | 1.65             | 38.9       |
| Helicobacter pylori Hp P-15b       | ASM27442v1      | 1.66             | 38.9       |
| Helicobacter pylori Hp P-16        | ASM27430v1      | 1.55             | 39.1       |
| Helicobacter pylori Hp P-1b        | ASM27444v1      | 1.67             | 39.1       |
| Helicobacter pylori Hp P-2         | ASM27480v1      | 1.69             | 39         |
| Helicobacter pylori Hp P-23        | ASM27432v1      | 1.64             | 38.8       |
| Helicobacter pylori Hp P-25        | ASM27486v1      | 1.67             | 39.2       |
| Helicobacter pylori Hp P-25c       | ASM27446v1      | 1.67             | 39.1       |
| Helicobacter pylori Hp P-25d       | ASM27514v1      | 1.66             | 39.2       |
| Helicobacter pylori Hp P-26        | ASM27538v1      | 1.7              | 39         |
| Helicobacter pylori Hp P-28b       | ASM27534v1      | 1.63             | 39.3       |
| Helicobacter pylori Hp P-2b        | ASM27550v1      | 1.71             | 39         |
| Helicobacter pylori Hp P-3         | ASM27482v1      | 1.66             | 39.2       |
| Helicobacter pylori Hp P-30        | ASM27540v1      | 1.64             | 38.8       |
| Helicobacter pylori Hp P-3b        | ASM27552v1      | 1.66             | 39.2       |
| Helicobacter pylori Hp P-4         | ASM27484v1      | 1.7              | 39.1       |
| Helicobacter pylori Hp P-41        | ASM27542v1      | 1.72             | 39.1       |
| Helicobacter pylori Hp P-4c        | ASM27536v1      | 1.68             | 39.1       |
| Helicobacter pylori Hp P-4d        | ASM27474v1      | 1.68             | 39.1       |
| Helicobacter pylori Hp P-62        | ASM27544v1      | 1.65             | 39.1       |
| Helicobacter pylori Hp P-74        | ASM27434v1      | 1.62             | 39         |
| Helicobacter pylori Hp P-8         | ASM27424v1      | 1.62             | 39.3       |
| Helicobacter pylori Hp P-8b        | ASM27476v1      | 1.63             | 39.3       |
| Helicobacter pylori HP116Bi        | ASM34572v1      | 1.65             | 39.2       |
| Helicobacter pylori HP250AFii      | ASM34574v1      | 1.59             | 39.4       |
| Helicobacter pylori HP250AFiii     | ASM34576v1      | 1.58             | 39.4       |
| Helicobacter pylori HP250AFiV      | ASM34578v1      | 1.59             | 39.4       |
| Helicobacter pylori HP250ASi       | ASM34580v1      | 1.58             | 39.4       |
| Helicobacter pylori HP250BFi       | ASM34584v1      | 1.6              | 39.3       |
| Helicobacter pylori HP250BFii      | ASM34586v1      | 1.59             | 39.4       |
| Helicobacter pylori HP250BSi       | ASM34592v1      | 1.58             | 39.4       |
| Helicobacter pylori HP260AFi       | ASM34594v1      | 1.64             | 39.3       |
| Helicobacter pylori HP260ASii      | ASM34598v1      | 1.64             | 39.3       |
| Helicobacter pylori HP260BFii      | ASM34600v1      | 1.58             | 39.5       |
| Helicobacter pylori HPKX_438_AG0C1 | ASM17219v1      | 1.82             | 39.5       |
| Helicobacter pylori HPKX_438_CA4C1 | ASM17221v1      | 1.57             | 39.3       |
| Helicobacter pylori N6             | ASM28589v1      | 1.66             | 38.7       |
| Helicobacter pylori NAB47          | ASM25607v2      | 1.59             | 39         |

**Supp. Table 3 continued: WGS strains used for comparative genomics**

| <b>Organism</b>            | <b>Assembly</b> | <b>Size (Mb)</b> | <b>GC%</b> |
|----------------------------|-----------------|------------------|------------|
| Helicobacter pylori NAD1   | ASM25603v2      | 1.6              | 38.7       |
| Helicobacter pylori NQ1671 | ASM28523v1      | 1.63             | 39.1       |
| Helicobacter pylori NQ1701 | ASM28513v1      | 1.64             | 38.9       |
| Helicobacter pylori NQ1707 | ASM28517v1      | 1.65             | 38.9       |
| Helicobacter pylori NQ1712 | ASM28509v1      | 1.57             | 39.1       |
| Helicobacter pylori NQ315  | ASM28507v1      | 1.6              | 39         |
| Helicobacter pylori NQ352  | ASM28511v1      | 1.64             | 38.9       |
| Helicobacter pylori NQ367  | ASM28521v1      | 1.62             | 39.1       |
| Helicobacter pylori NQ392  | ASM28515v1      | 1.65             | 38.9       |
| Helicobacter pylori NQ4044 | ASM27462v1      | 1.73             | 38.7       |
| Helicobacter pylori NQ4053 | ASM27460v1      | 1.65             | 38.9       |
| Helicobacter pylori NQ4060 | ASM28519v1      | 1.65             | 38.9       |
| Helicobacter pylori NQ4076 | ASM27458v1      | 1.63             | 39         |
| Helicobacter pylori NQ4099 | ASM27456v1      | 1.65             | 39         |
| Helicobacter pylori NQ4110 | ASM27454v1      | 1.6              | 39.1       |
| Helicobacter pylori NQ4161 | ASM27452v1      | 1.64             | 39         |
| Helicobacter pylori NQ4191 | ASM28525v1      | 1.63             | 39         |
| Helicobacter pylori NQ4200 | ASM27490v1      | 1.65             | 38.9       |
| Helicobacter pylori NQ4216 | ASM27494v1      | 1.66             | 38.9       |
| Helicobacter pylori NQ4228 | ASM27492v1      | 1.65             | 39         |
| Helicobacter pylori P79    | ASM25882v1      | 1.62             | 38.9       |
| Helicobacter pylori PZ5004 | HP_PZ5004       | 1.59             | 38.7       |
| Helicobacter pylori PZ5024 | HP_PZ5024       | 1.52             | 38.3       |
| Helicobacter pylori PZ5026 | HP_PZ5026       | 1.62             | 38.7       |
| Helicobacter pylori PZ5056 | HP_PZ5056       | 1.6              | 38.7       |
| Helicobacter pylori PZ5080 | HP_PZ5080       | 1.61             | 38.6       |
| Helicobacter pylori PZ5086 | HP_PZ5086       | 1.56             | 38.8       |
| Helicobacter pylori R018c  | ASM29985v1      | 1.65             | 38.9       |
| Helicobacter pylori R030b  | ASM29969v1      | 1.61             | 39.2       |
| Helicobacter pylori R036d  | ASM29971v1      | 1.64             | 38.9       |
| Helicobacter pylori R037c  | ASM29973v1      | 1.61             | 38.8       |
| Helicobacter pylori R038b  | ASM29975v1      | 1.63             | 39         |
| Helicobacter pylori R046Wa | ASM29977v1      | 1.59             | 39.1       |
| Helicobacter pylori R055a  | ASM29979v1      | 1.63             | 38.9       |
| Helicobacter pylori R056a  | ASM29981v1      | 1.65             | 38.9       |
| Helicobacter pylori R32b   | ASM29983v1      | 1.58             | 38.9       |
| Helicobacter pylori UM023  | UM023           | 1.62             | 38.8       |
| Helicobacter pylori UM038  | UM038           | 1.76             | 38.4       |
| Helicobacter pylori UM065  | UM065           | 1.59             | 38.9       |
| Helicobacter pylori UM067  | UM067           | 1.68             | 39         |
| Helicobacter pylori UM077  | UM077           | 1.62             | 38.8       |
| Helicobacter pylori UM084  | UM084           | 1.66             | 39.1       |
| Helicobacter pylori UM085  | UM085           | 1.65             | 38.7       |
| Helicobacter pylori UM111  | UM111           | 1.66             | 38.7       |
| Helicobacter pylori UM114  | UM114           | 1.71             | 38.9       |
